## Appendix 1. Postoperative Pulmonary Complications – Data Definitions

| Postoperative Pulmonary Complication Component                                                                  | Data Source                                                                  | Definition                                                                                                                                                                                                                                                                                                                                                          |
|-----------------------------------------------------------------------------------------------------------------|------------------------------------------------------------------------------|---------------------------------------------------------------------------------------------------------------------------------------------------------------------------------------------------------------------------------------------------------------------------------------------------------------------------------------------------------------------|
| Prolonged initial postoperative ventilator duration longer than 24 h                                            | STS database                                                                 | Yes/No Indicate whether the patient had prolonged postoperative pulmonary ventilation longer than 24.0 h.                                                                                                                                                                                                                                                           |
| Pneumonia                                                                                                       | STS database                                                                 | Yes/No Indicate whether the patient had pneumonia according to the Centers for Disease Control and Prevention definition.                                                                                                                                                                                                                                           |
| Reintubation                                                                                                    | STS database                                                                 | Yes/No Indicate whether the patient was reintubated during the hospital stay after the initial extubation. This may include patients who have been extubated in the OR and require intubation in the postoperative period.                                                                                                                                          |
| Postoperative PaO <sub>2</sub> :FiO <sub>2</sub> below 100 mmHg within 48 hours postoperatively while intubated | Hospital enterprise electronic health record (Epic Systems Corporation, USA) | Yes/No Indicate whether the patient had a postoperative PaO <sub>2</sub> :FiO <sub>2</sub> below 100 mmHg within 48 h while intubated: <ul style="list-style-type: none"> <li>• Intubated determined by ventilator mode</li> <li>• FiO<sub>2</sub> determined by ventilator setting</li> <li>• PaO<sub>2</sub> determined by arterial blood gas analysis</li> </ul> |

FiO<sub>2</sub>, fraction of inspired oxygen; PaO<sub>2</sub>, arterial partial pressure of oxygen; STS, Society of Thoracic Surgeons.

## ANESTHESIOLOGY REFLECTIONS FROM THE WOOD LIBRARY-MUSEUM

## Dr. Rudolph Matas: Surgeon, Author, and an American Pioneer of Spinal Anesthesia

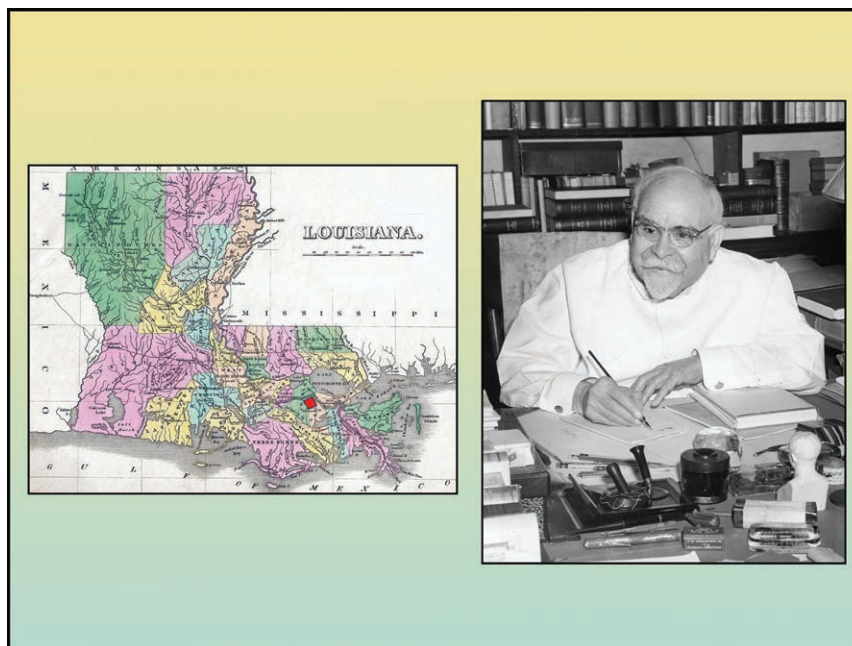

Born in Bonnet Carre, Louisiana (see red diamond, left), Rudolph Matas (1860 to 1957) was raised in Spain and then Texas before returning to his birth state for eventual medical schooling at the future Tulane University School of Medicine. After earning his M.D. at 19 yr of age, Dr. Matas began transforming himself into “the most learned surgeon” that Dr. Will Mayo had “ever known.” Along the way, in 1889, Dr. Matas would also conduct America’s first spinal anesthetic. By December of 1940, Matas was completing his eighth year of penning (right) a five-volume medical history of Louisiana. (Copyright © the American Society of Anesthesiologists’ Wood Library-Museum of Anesthesiology.)

*George S. Bause, M.D., M.P.H., Honorary Curator and Laureate of the History of Anesthesia, Wood Library-Museum of Anesthesiology, Schaumburg, Illinois, and Clinical Associate Professor, Case Western Reserve University, Cleveland, Ohio. UJYC@aol.com.*
